# Supplementary material for: Health promotion interventions for African Americans delivered in U.S. barbershops and hair salons- a systematic review
Source: PubMed Central journal article supplement (PMC8365990; doi:10.1186/s12889-021-11584-0), 2021-08-16
Supplement: 12889_2021_11584_MOESM2_ESM.pdf [file 12889_2021_11584_MOESM2_ESM.pdf]

# Article Data Extraction

---

Article ID

\_\_\_\_\_

(enter ID # from Covidence)

---

Title

\_\_\_\_\_

---

First Author

\_\_\_\_\_

---

Year

\_\_\_\_\_

---

Sample Size

\_\_\_\_\_

---

Age range or mean age

\_\_\_\_\_

---

Socioeconomic Status

\_\_\_\_\_

---

Participants' Disease Status or Risk Factors

\_\_\_\_\_

(Did the participants have: Hypertension, Prediabetes, etc)

---

Geographic location

\_\_\_\_\_

(city, region, etc)

---

Disease state/focus

- Cardiovascular Disease  
 Cancer  
 Type 2 Diabetes  
 Obesity

---

Study Design

- Randomized Control Trial  
 Cluster Randomized Control Trial  
 Posttest only  
 Pretest-Posttest  
 Other

---

Study Setting

- Barbershop  
 Hair Salon  
 Both

---

Intervention

\_\_\_\_\_

(Briefly describe)

---

Intervention Duration

\_\_\_\_\_

(reporting in weeks preferred)

---

Intervention follow up time points

---

---

CBPR approach?

- Yes  
 No  
 Not reported
- 

---

Interventionist

- Barber/stylist  
 Researcher/research staff  
 Medical Professional  
 Other  
 Not reported
- 

---

Other

---

---

Were culturally-sensitive strategies implemented?

- Yes  
 No  
 Not reported
- 

---

Describe

---

---

Incentives

- Barber/Sylist  
 Customers  
 Both  
 Not reported
- 

---

Theoretical Frameworks/Models

---

(SCT, HBM, SEM, etc)

---

---

Barbershop/Hair Salon Recruitment Strategies

---

---

Comparison

---

(Briefly describe)

---

---

Primary Outcome

---

(Be as specific as possible)

---

---

Results

---

---

Significant?

- Yes  
 No
-

---

Secondary Outcome(s)

---

---

Significant Results

---

---

Feasibility Outcomes

- Satisfaction with intervention
- Intention to continue intervention
- Practicality
- Integration
- Limited efficacy
- Other
- Not reported/not applicable  
(select all that apply)

---

Other

---

---

Results

---

---

Intervention training

---

---

Measures of Fidelity

---

---

Major limitations

---

---

References to obtain

---

\_\_\_\_\_  
(additional references to screen)

---

Notes

---

---

Article PDF

---

---

Extracted By:

- Kelly
- Patrick

---

Extraction completed on:

---

---

Reviewed by Forest?

- Yes
- No

---

Reviewed on:

---
