# Supplementary material for: Health promotion interventions for African Americans delivered in U.S. barbershops and hair salons- a systematic review
Source: PubMed Central journal article supplement (PMC8365990; doi:10.1186/s12889-021-11584-0), 2021-08-16
Supplement: 12889_2021_11584_MOESM3_ESM.pdf [file 12889_2021_11584_MOESM3_ESM.pdf]

# Quality Assessment

Article ID

(enter ID # from Covidence)

## Selection Bias

Are the individuals selected to participate in the study likely to be representative of the target population?

- Very likely  
 Somewhat likely  
 Not likely  
 Can't tell

What percentage of selected individuals agreed to participate?

- 80-100% agreement  
 60-79% agreement  
 less than 60% agreement  
 Not applicable  
 Can't tell

Rate this section

- Strong    Moderate  
 Weak

## Study Design

Indicate the study design

- Randomized controlled trial  
 Controlled clinical trial  
 Cohort analytic (two group pre + post)  
 Case-control  
 Cohort (one group pre + post (before and after))  
 Interrupted time series  
 Other  
 Can't tell

Was the study described as randomized?

- Yes  
 No

Was the method of randomization described?

- Yes  
 No

Was the method appropriate?

- Yes  
 No

Rate this section

- Strong    Moderate  
 Weak

## Confounders

Were there important differences between groups prior to the intervention?

- Yes  
 No  
 Can't tell  
 (race, sex, marital status/family, age, SES, education, health status, Pre-intervention score on outcome measure)

Indicate the percentage of relevant confounders that were controlled (either in the design (e.g. stratification, matching) or analysis)?

- 80 - 100% (most)  
 60 - 79% (some)  
 Less than 60% (few or none)  
 Can't Tell

Rate this section

- Strong    Moderate  
 Weak

### Blinding

Was (were) the outcome assessor(s) aware of the intervention or exposure status of participants?

- Yes  
 No  
 Can't tell

Were the study participants aware of the research question?

- Yes  
 No  
 Can't tell

Rate this section

- Strong    Moderate  
 Weak

### Data Collection Methods

Were data collection tools shown to be valid?

- Yes  
 No  
 Can't tell

Were data collection tools shown to be reliable?

- Yes  
 No  
 Can't tell

Rate this section

- Strong    Moderate  
 Weak

### Withdrawals and Drop-Outs

Were withdrawals and drop-outs reported in terms of numbers and/or reasons per group?

- Yes  
 No  
 Can't tell  
 Not applicable (i.e. one time surveys or interviews)

Indicate the percentage of participants completing the study. (If the percentage differs by groups, record the lowest).

- 80 - 100%  
 60 - 79%  
 Less than 60%  
 Can't Tell  
 Not Applicable (i.e. Retrospective case-control)

Rate this section

- Strong    Moderate  
 Weak    Not applicable

**Intervention Integrity**

What percentage of participants received the allocated intervention or exposure of interest?

80 - 100%

60 - 79%

Less than 60%

Can't Tell

Was the consistency of the intervention measured?

Yes

No

Can't tell

Is it likely that subjects received an unintended intervention (contamination or co-intervention) that may influence the results?

Yes

No

Can't tell

**Analyses**

Indicate the unit of allocation

Community

Organization/Institution

Practice/Office

Individual

Indicate the unit of analysis

Community

Organization/Institution

Practice/Office

Individual

Are the statistical methods appropriate for the study design?

Yes

No

Can't tell

Is the analysis performed by intervention allocation status (i.e. intention to treat) rather than the actual intervention received?

Yes

No

Can't tell

**Component Ratings**

|                           | Strong                | Moderate              | Weak                  |
|---------------------------|-----------------------|-----------------------|-----------------------|
| Selection Bias            | <input type="radio"/> | <input type="radio"/> | <input type="radio"/> |
| Study Design              | <input type="radio"/> | <input type="radio"/> | <input type="radio"/> |
| Confounders               | <input type="radio"/> | <input type="radio"/> | <input type="radio"/> |
| Blinding                  | <input type="radio"/> | <input type="radio"/> | <input type="radio"/> |
| Data Collection Methods   | <input type="radio"/> | <input type="radio"/> | <input type="radio"/> |
| Withdrawals and Drop-Outs | <input type="radio"/> | <input type="radio"/> | <input type="radio"/> |

GLOBAL RATING FOR THIS PAPER

Strong (no weak ratings)

Moderate (one weak rating)

Weak (2 or more weak ratings)

Is there a discrepancy between the two reviewers with respect to the component ratings?

Yes  No  
(With both reviewers discussing the ratings)

Indicate the reason for the discrepancy

Oversight

Differences in interpretation of criteria

Differences in interpretation of study

---

Final decision of both reviewers

- Strong
- Moderate
- Weak
